# Supplementary material for: Development of an Artificial Intelligence Diagnostic System Using Linked Color Imaging for Barrett’s Esophagus
Source: MDPI journal article supplement (doi:10.3390/jcm13071990), 2024-03-29
Supplement: s1 [file s1]

Table S1. Evaluation of AI diagnostic results for test data using WLI

| Parameter |    |    | AI diagnosis      |           | total | <i>P</i> value            |                           |
|-----------|----|----|-------------------|-----------|-------|---------------------------|---------------------------|
| SSBE      | PV | RE | correct<br>n. (%) | incorrect |       | PV<br>none vs.<br>present | RE<br>none vs.<br>present |
| +         | -  | +  | 18 (90.0)         | 2         | 20    | 0.55                      | 0.13                      |
|           | +  | +  | 10 (71.4)         | 4         | 14    |                           |                           |
|           | -  | -  | 24 (92.3)         | 2         | 26    |                           |                           |
|           | +  | -  | 17 (100.0)        | 0         | 17    |                           |                           |
| -         | -  | +  | 17 (77.3)         | 5         | 22    |                           | 1                         |
|           | -  | -  | 20 (74.1)         | 7         | 27    |                           |                           |
| total     |    |    | 106 (84.1)        | 20        | 126   |                           |                           |

AI, artificial intelligence; PV, palisade vessels; RE, reflux esophagitis; SSBE, short-segment Barrett's esophagus; WLI, white light imaging

Table S2. Evaluation of AI diagnostic results for test data using LCI

| Parameter |    |    | AI diagnosis     |           | total | <i>P</i> value            |                           |
|-----------|----|----|------------------|-----------|-------|---------------------------|---------------------------|
| SSBE      | PV | RE | correct<br>n (%) | incorrect |       | PV<br>none vs.<br>present | RE<br>none vs.<br>present |
| +         | -  | +  | 16 (80.0)        | 4         | 20    | 0.38                      | 0.25                      |
|           | +  | +  | 11 (91.7)        | 1         | 12    |                           |                           |
|           | -  | -  | 27 (93.1)        | 2         | 29    |                           |                           |
|           | +  | -  | 19 (95.0)        | 1         | 20    |                           |                           |
| -         | -  | +  | 21 (95.5)        | 1         | 22    |                           | 0.64                      |
|           | -  | -  | 30 (88.2)        | 4         | 34    |                           |                           |
| total     |    |    | 124 (90.5)       | 13        | 137   |                           |                           |

AI, artificial intelligence; LCI, linked color imaging; PV, palisade vessels; RE, reflux esophagitis; SSBE, short-segment Barrett's esophagus
